# Supplementary material for: Uncovering the trimethylamine-producing bacteria of the human gut microbiota
Source: PubMed Central journal article supplement (PMC5433236; doi:10.1186/s40168-017-0271-9), 2017-05-15
Supplement: 40168_2017_271_MOESM5_ESM.pdf [file 40168_2017_271_MOESM5_ESM.pdf]

|    | Sex | Age  | BMI  | Smoker | Disease(s)                                                                | ABs |
|----|-----|------|------|--------|---------------------------------------------------------------------------|-----|
| 1  | f   | 32.8 | 21.9 | -      |                                                                           | -   |
| 2  | m   | 54.3 | 26.6 | +      | Multiple sclerosis                                                        | -   |
| 3  | f   | 35.1 | 24.8 | -      |                                                                           | -   |
| 4  | f   | 45.7 | 26.2 | +      | Rest-less-legs, depression, psoriasis                                     | -   |
| 5  | m   | 32.9 | 27.6 | -      |                                                                           | -   |
| 6  | m   | 58.9 | 36.6 | -      | Hypertonus                                                                | -   |
| 7  | m   | 58.7 | 34.0 | -      | Hypercholesterolaemia, coronary artery disease                            | -   |
| 8  | f   | 60.9 | 26.4 | +      | Hypertension                                                              | -   |
| 9  | m   | 35.9 | 20.7 | +      | Ventricular extrasystoles                                                 | -   |
| 10 | f   | 38.9 | 27.2 | -      |                                                                           | -   |
| 11 | f   | 55.7 | 29.8 | -      |                                                                           | -   |
| 12 | m   | 23.2 | 22.6 | -      |                                                                           | -   |
| 13 | m   | 64.1 | 23.8 | -      |                                                                           | -   |
| 14 | f   | 58.7 | 36.2 | -      | Status post stroke, diabetes, gout, hypertonus, peripheral artery disease | -   |
| 15 | f   | 59.6 | 27.4 | -      |                                                                           | -   |
| 16 | f   | 25.3 | 22.0 | -      |                                                                           | -   |
| 17 | f   | 24.3 | 20.4 | -      | Hay fever                                                                 | -   |
| 18 | f   | 57.9 | 30.1 | -      | Depression, arthrosis                                                     | -   |
| 19 | m   | 39.0 | 24.8 | -      | Hypertension                                                              | -   |
| 20 | f   | 64.7 | 25.2 | -      |                                                                           | -   |
| 21 | f   | 55.5 | 25.0 | -      |                                                                           | -   |
| 22 | f   | 76.8 | 36.1 | -      | Hypertonus                                                                | -   |
| 23 | f   | 63.9 | 27.3 | -      | Hypothyroidism, hypertonus                                                | -   |
| 24 | f   | 64.2 | 19.9 | -      | Hypertonus, glaucoma, urticaria                                           | -   |
| 25 | m   | 78.1 | 31.6 | -      | Hypertonus, prostatic hyperplasia                                         | -   |
| 26 | m   | 29.1 | 24.3 | -      |                                                                           | -   |
| 27 | f   | 83.0 | 26.1 | -      | Athrosis, hypertonus                                                      | -   |
| 28 | f   | 42.9 | 23.2 | -      |                                                                           | -   |
| 29 | m   | 28.0 | 22.9 | -      |                                                                           | -   |
| 30 | m   | 58.6 | 25.5 | +      |                                                                           | -   |
| 31 | m   | 20.2 | 41.6 | -      |                                                                           | -   |
| 32 | f   | 26.3 | 19.5 | -      |                                                                           | -   |
| 33 | m   | 60.6 | 34.0 | +      | Hypertension                                                              | -   |
| 34 | f   | 28.9 | 26.7 | -      |                                                                           | -   |
| 35 | f   | 33.4 | 25.5 | -      |                                                                           | -   |
| 36 | m   | 30.4 | 23.4 | +      |                                                                           | -   |
| 37 | m   | 31.8 | 24.9 | -      |                                                                           | -   |
| 38 | f   | 27.8 | 17.7 | -      |                                                                           | +   |
| 39 | m   | 40.1 | 26.4 | -      |                                                                           | -   |
| 40 | f   | 47.6 | 21.8 | +      | Hypercholesterolaemia, allergic rhinitis                                  | +   |
| 41 | m   | 61.7 | 29.4 | -      | Hypertonus                                                                | -   |
| 42 | m   | 60.0 | 29.7 | -      | Hypertonus                                                                | +   |
| 43 | m   | 69.3 | 28.0 | -      | Hypertonus                                                                | -   |
| 44 | f   | 51.3 | 27.5 | -      | Rheumatism                                                                | -   |
| 45 | f   | 58.5 | 29.1 | -      | Hypothyroidism                                                            | -   |
| 46 | m   | 28.4 | 25.1 | -      |                                                                           | -   |
| 47 | f   | 26.5 | 20.3 | -      | Hypothyreosis, hay fever                                                  | -   |
| 48 | m   | 29.4 | 22.3 | -      |                                                                           | -   |
| 49 | m   | 19.3 | 17.8 | -      |                                                                           | -   |
| 50 | f   | 34.0 | 33.9 | -      |                                                                           | -   |
