# Supplementary material for: Uncovering the trimethylamine-producing bacteria of the human gut microbiota
Source: PubMed Central journal article supplement (PMC5433236; doi:10.1186/s40168-017-0271-9), 2017-05-15

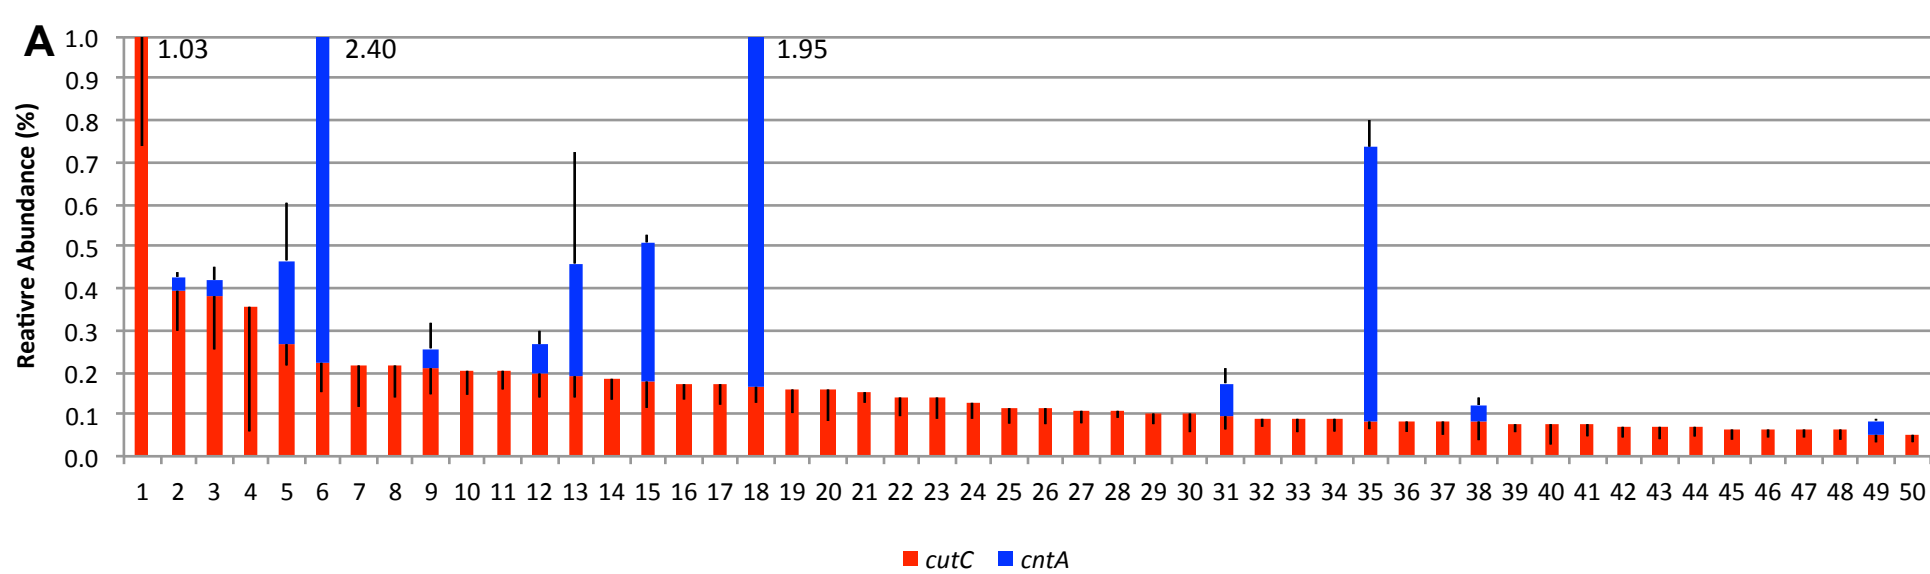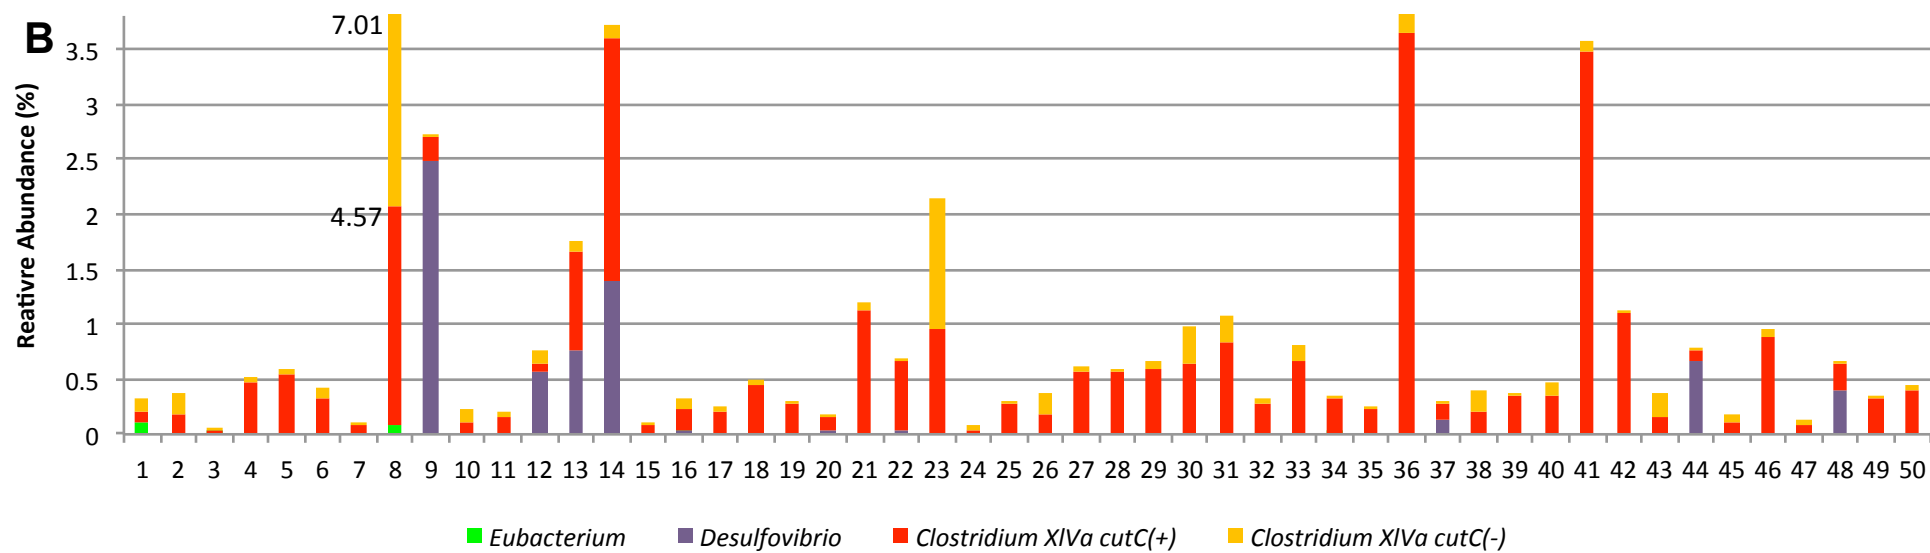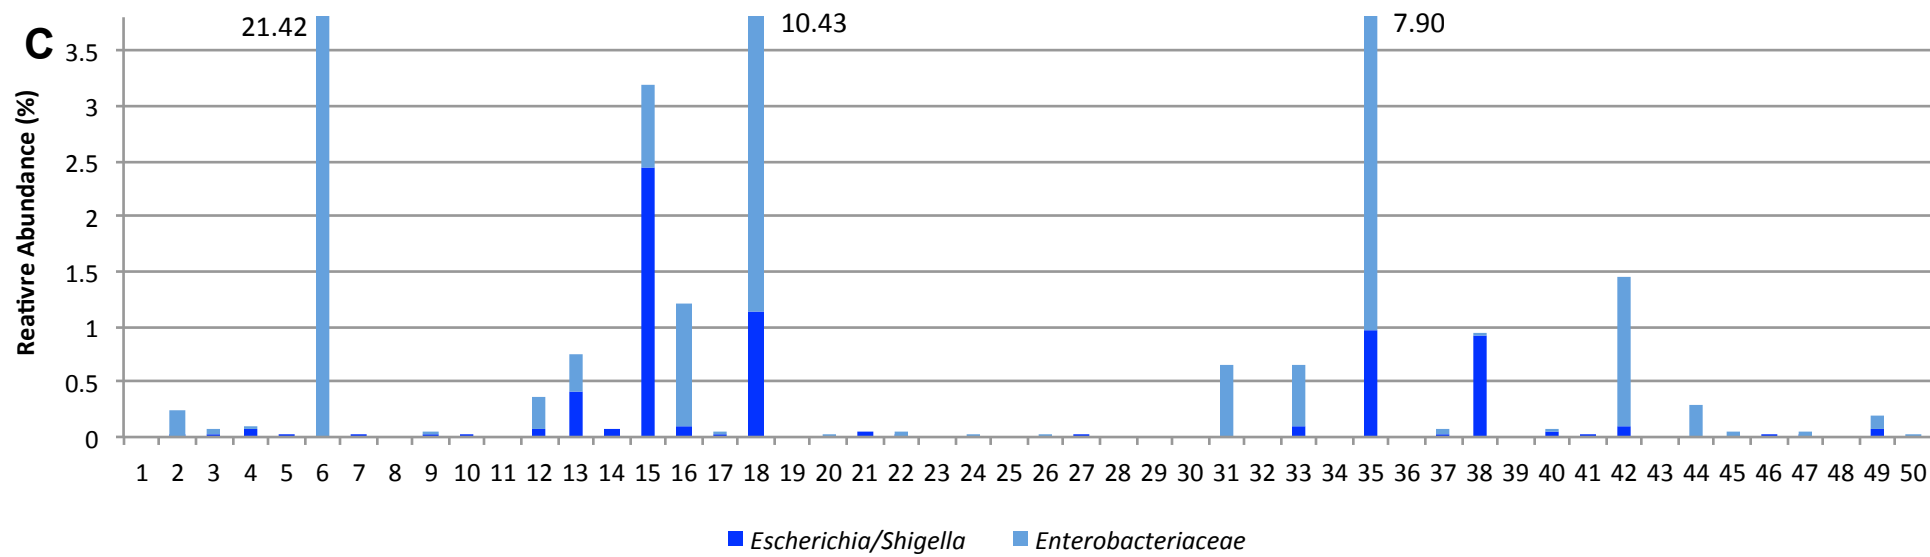

Supplement: 40168_2017_271_MOESM7_ESM.pdf [file 40168_2017_271_MOESM7_ESM.pdf]
