# Supplementary material for: Uncovering the trimethylamine-producing bacteria of the human gut microbiota
Source: PubMed Central journal article supplement (PMC5433236; doi:10.1186/s40168-017-0271-9), 2017-05-15

# (1) Amplification of target gene

## 1<sup>st</sup> PCR

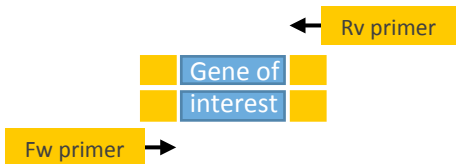

# (2) Adding an overhang

## 2<sup>nd</sup> PCR

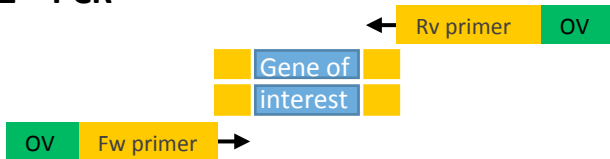

# (3) Dual barcoding

## 3<sup>rd</sup> PCR

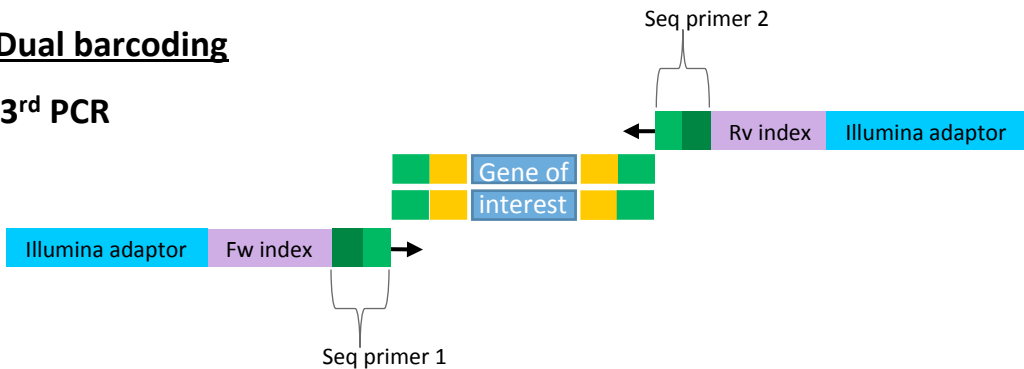

Supplement: 40168_2017_271_MOESM11_ESM.pdf [file 40168_2017_271_MOESM11_ESM.pdf]
